# Supplementary material for: Single-cell RNA sequencing reveals that BMPR2 mutation regulates right ventricular function via ID genes
Source: PubMed Central journal article supplement — Eur Respir J. 2022 Jul 7;60(1):2100327. doi: 10.1183/13993003.00327-2021 (PMC9260124; doi:10.1183/13993003.00327-2021), 2022-07-07

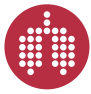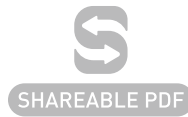

# Single-cell RNA sequencing reveals that *BMPR2* mutation regulates right ventricular function *via ID* genes

Mingxia Du<sup>1,2</sup>, Haibin Jiang<sup>1,2</sup>, Hongxian Liu<sup>1,2</sup>, Xin Zhao<sup>1,2</sup>, Yu Zhou<sup>3</sup>, Fang Zhou<sup>2</sup>, Chunmei Piao<sup>4</sup>, Guoqiang Xu<sup>5</sup>, Feng Ma<sup>6</sup>, Jianan Wang<sup>7</sup>, Frederic Perros<sup>8</sup>, Nicholas W. Morrell<sup>9</sup>, Hong Gu<sup>4</sup> and Jun Yang<sup>1</sup> 

<sup>1</sup>Dept of Physiology, and Dept of Cardiology of the Second Affiliated Hospital, Zhejiang University School of Medicine, Hangzhou, China. <sup>2</sup>Institute of Basic Medical Sciences, Chinese Academy of Medical Sciences and School of Basic Medicine, Peking Union Medical College, Beijing, China. <sup>3</sup>Dept of General Intensive Care Unit, The Second Affiliated Hospital of Zhejiang University School of Medicine, Hangzhou, China. <sup>4</sup>Dept of Pediatric Cardiology, Beijing Anzhen Hospital, Capital Medical University, Beijing, China. <sup>5</sup>Jiangsu Key Laboratory of Neuropsychiatric Diseases and College of Pharmaceutical Sciences, Jiangsu Key Laboratory of Preventive and Translational Medicine for Geriatric Diseases, Soochow University, Suzhou, China. <sup>6</sup>Institute of Blood Transfusion, Chinese Academy of Medical Sciences, Chengdu, China. <sup>7</sup>Dept of Cardiology of the Second Affiliated Hospital, Zhejiang University School of Medicine, Hangzhou, China. <sup>8</sup>Université Paris-Saclay, AP-HP, INSERM UMR\_S 999, Service de Pneumologie et Soins Intensifs Respiratoires, Hôpital de Bicêtre, Le Kremlin Bicêtre, France. <sup>9</sup>Dept of Medicine, University of Cambridge School of Clinical Medicine, Addenbrooke's Hospital, Cambridge, UK.

Corresponding author: Jun Yang ([yang\\_jun@zju.edu.cn](mailto:yang_jun@zju.edu.cn))

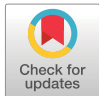

Shareable abstract (@ERSpublications)

This study reports for the first time that inhibitor of DNA-binding protein knockout mice developed pulmonary arterial hypertension and that the *USP9X* gene was a downstream effector of *ID* during heart development in CHD-PAH patients with *BMPR2* mutations. <https://bit.ly/3ciUNim>

**Cite this article as:** Du M, Jiang H, Liu H, *et al.* Single-cell RNA sequencing reveals that *BMPR2* mutation regulates right ventricular function *via ID* genes. *Eur Respir J* 2022; 60: 2100327 [DOI: 10.1183/13993003.00327-2021].

This single-page version can be shared freely online.

Copyright ©The authors 2022.

This version is distributed under the terms of the Creative Commons Attribution Non-Commercial Licence 4.0. For commercial reproduction rights and permissions contact [permissions@ersnet.org](mailto:permissions@ersnet.org)

Received: 2 Feb 2021  
Accepted: 10 Nov 2021

## Abstract

**Background** Mutations in bone morphogenetic protein type II receptor (*BMPR2*) have been found in patients with congenital heart disease-associated pulmonary arterial hypertension (CHD-PAH). Our study aimed to clarify whether deficient *BMPR2* signalling acts through downstream effectors, inhibitors of DNA-binding proteins (*IDs*) during heart development to contribute to the progress of PAH in CHD patients.

**Methods** To confirm that *IDs* are downstream effectors of *BMPR2* signalling in cardiac mesoderm progenitors (CMPs) and contribute to PAH, we generated cardiomyocyte-specific *Id 1/3* knockout mice (*Ids* cDKO), and 12 out of 25 developed mild PAH with altered haemodynamic indices and pulmonary vascular remodelling. Moreover, we generated *ID1* and *ID3* double-knockout (*IDs* KO) human embryonic stem cells that recapitulated the *BMPR2* signalling deficiency of CHD-PAH induced pluripotent stem cells (iPSCs).

**Results** Cardiomyocytes differentiated from iPSCs derived from CHD-PAH patients with *BMP* receptor mutations exhibited dysfunctional cardiac differentiation and reduced calcium ( $\text{Ca}^{2+}$ ) transients, as evidenced by confocal microscopy experiments. *Smad1/5* phosphorylation and *ID1* and *ID3* expression were reduced in CHD-PAH iPSCs and in *Bmpr2*<sup>+/-</sup> rat right ventricles. Moreover, ultrasound revealed that 33% of *Ids* cDKO mice had detectable defects in their ventricular septum and pulmonary regurgitation. Cardiomyocytes isolated from mouse right ventricles also showed reduced  $\text{Ca}^{2+}$  transients and shortened sarcomeres. Single-cell RNA sequencing analysis revealed impaired differentiation of CMPs and downregulated *USP9X* expression in *IDs* KO cells compared with wild-type cells.

**Conclusion** We found that *BMPR2* signals through *IDs* and *USP9X* to regulate cardiac differentiation, and the loss of *ID1* and *ID3* expression contributes to cardiomyocyte dysfunction in CHD-PAH patients with *BMPR2* mutations.

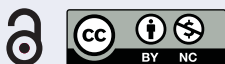

Supplement: ERJ-00327-2021.Shareable.pdf [file ERJ-00327-2021.Shareable.pdf]
