# Supplementary figures and images for: Single-cell RNA sequencing reveals that BMPR2 mutation regulates right ventricular function via ID genes
Source: PubMed Central journal article supplement — Eur Respir J. 2022 Jul 7;60(1):2100327. doi: 10.1183/13993003.00327-2021 (PMC9260124; doi:10.1183/13993003.00327-2021), 2022-07-07

Figure S1

a)

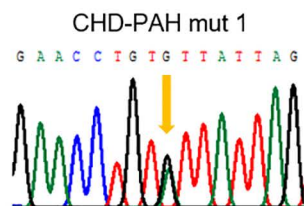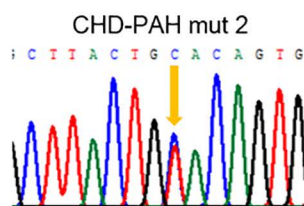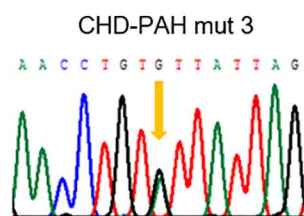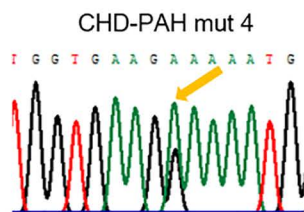

b)

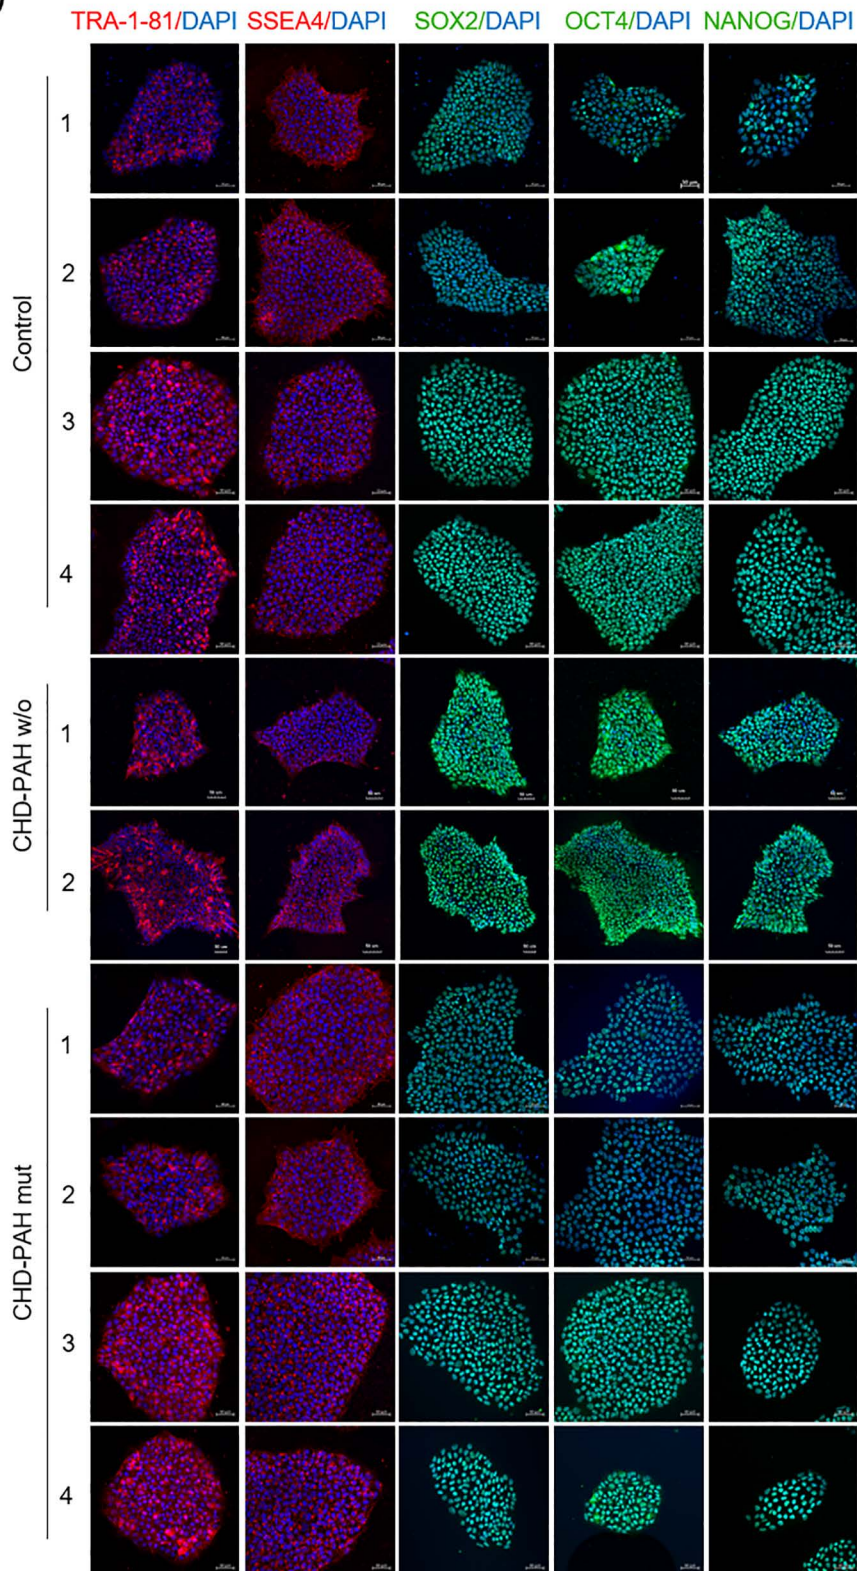

Figure S2

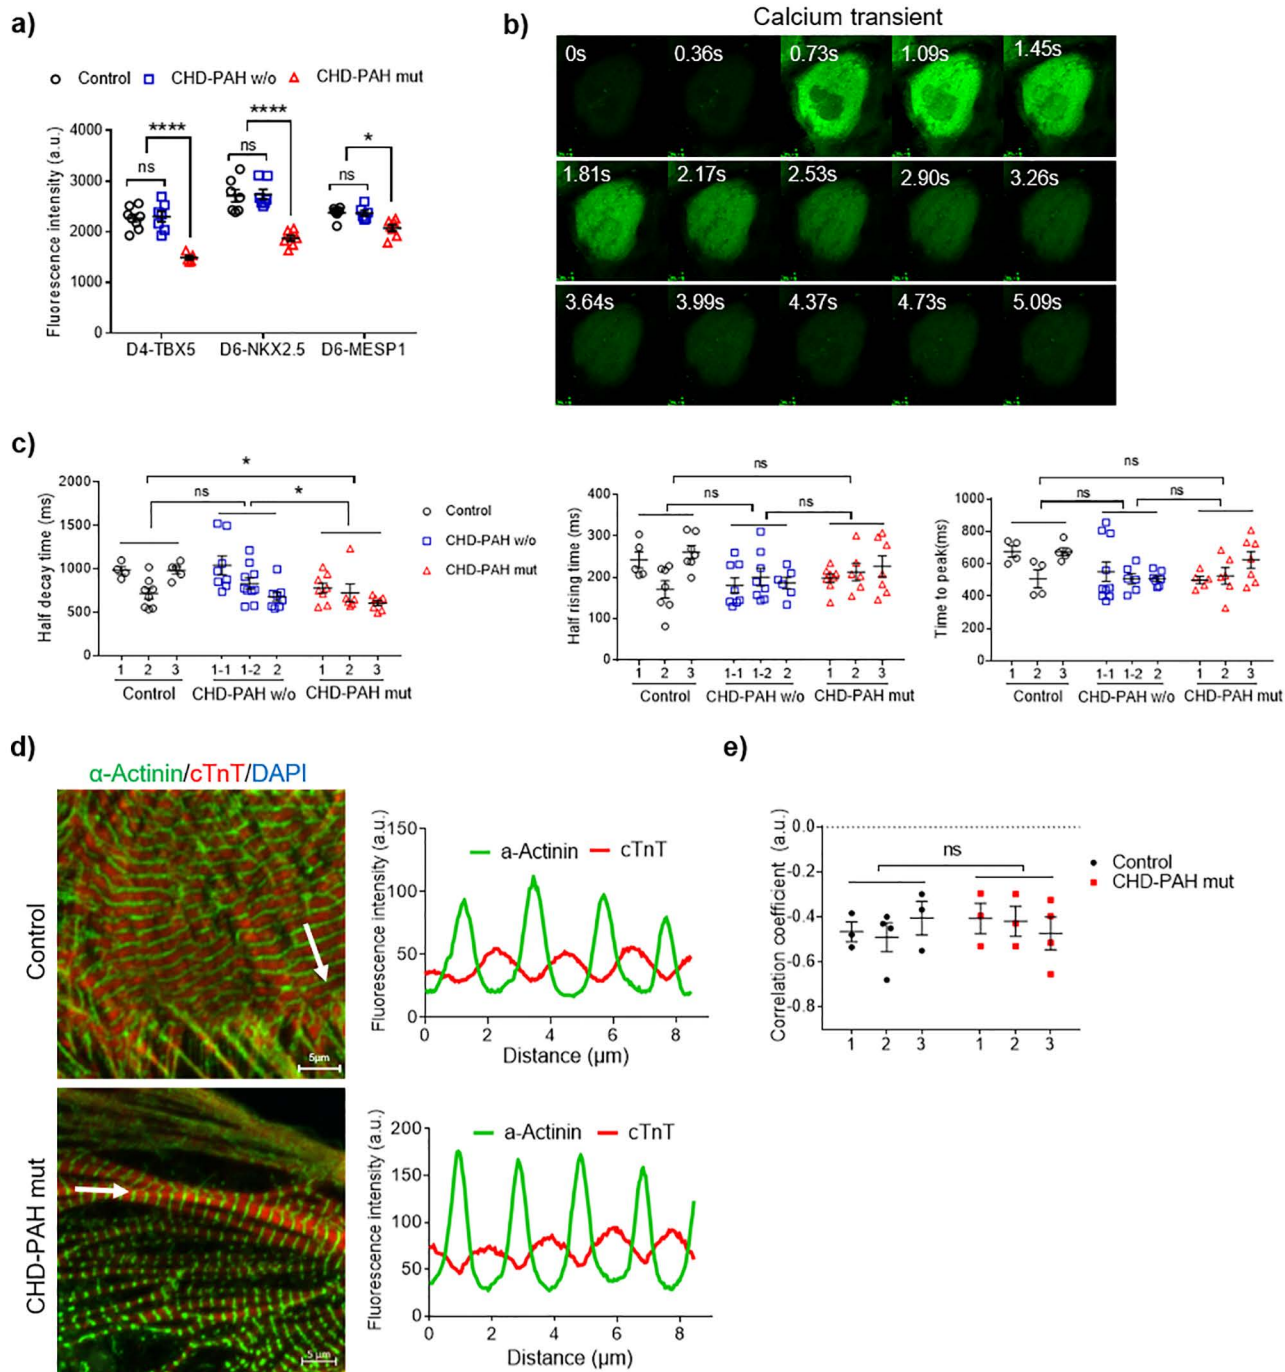

Figure S3

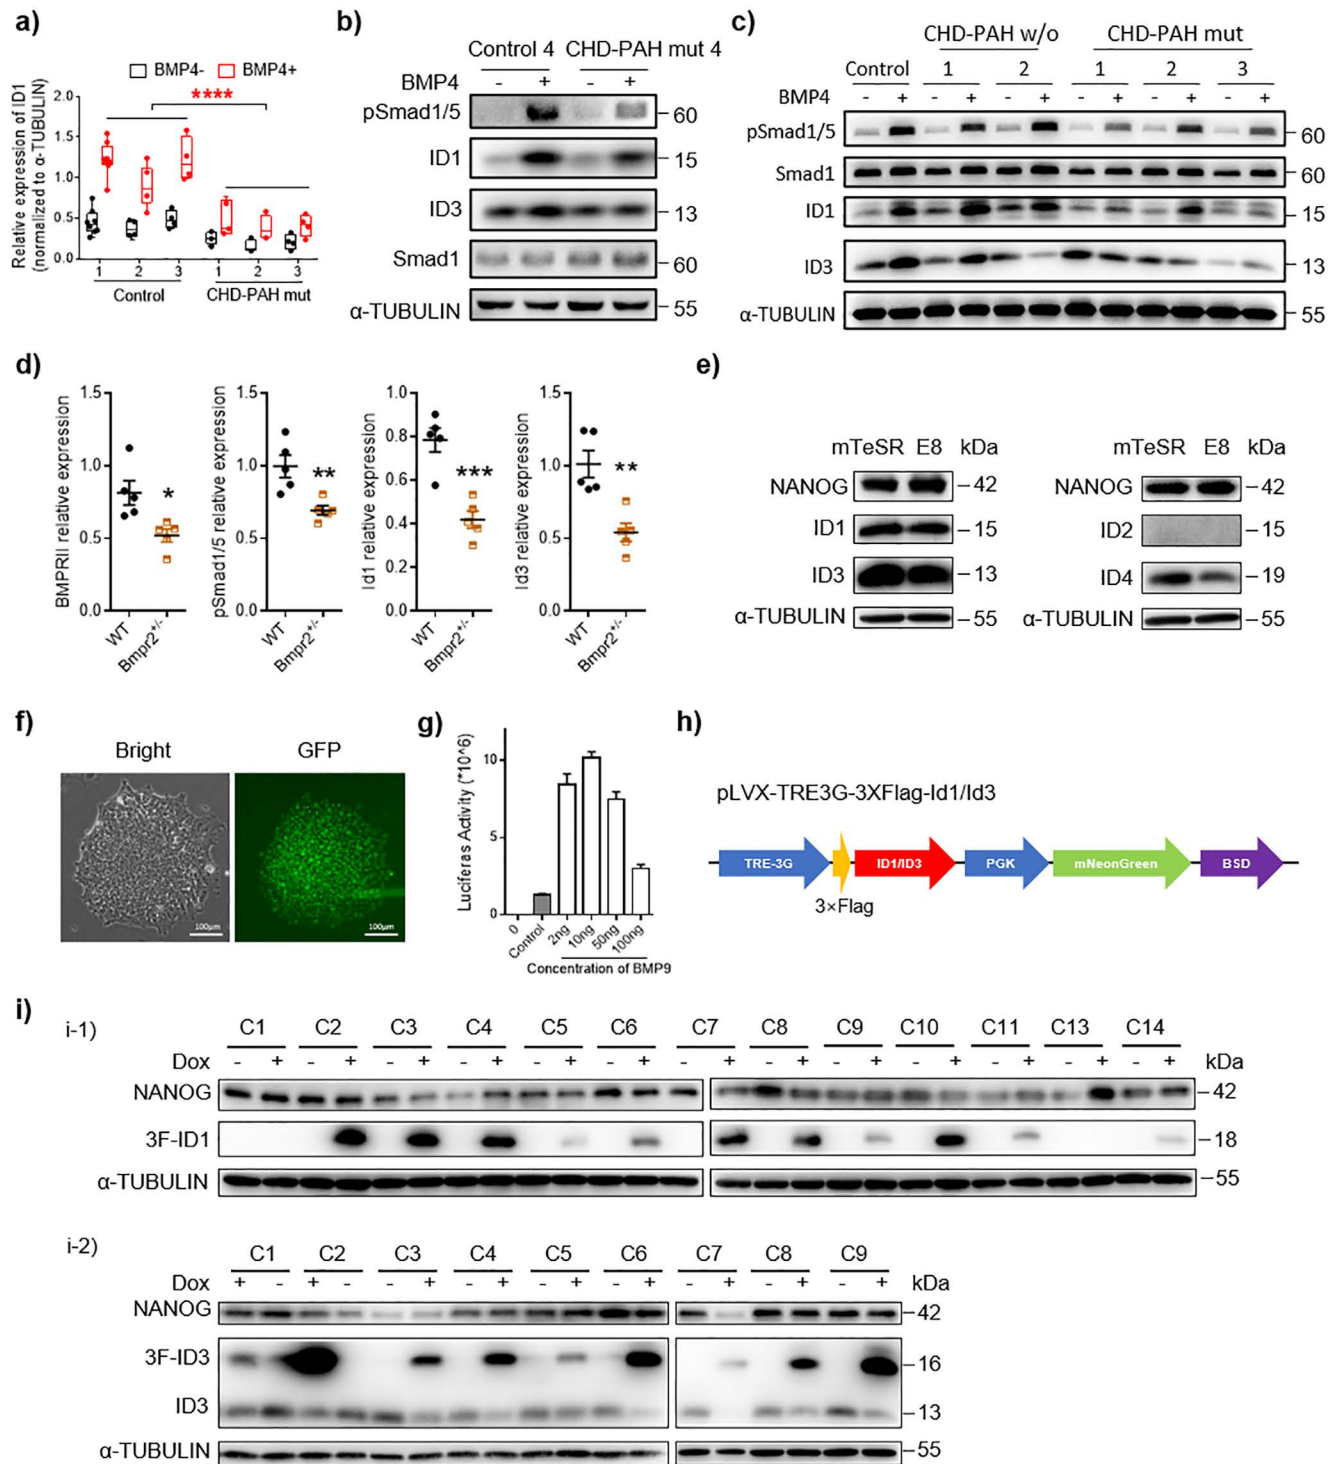



Figure S4

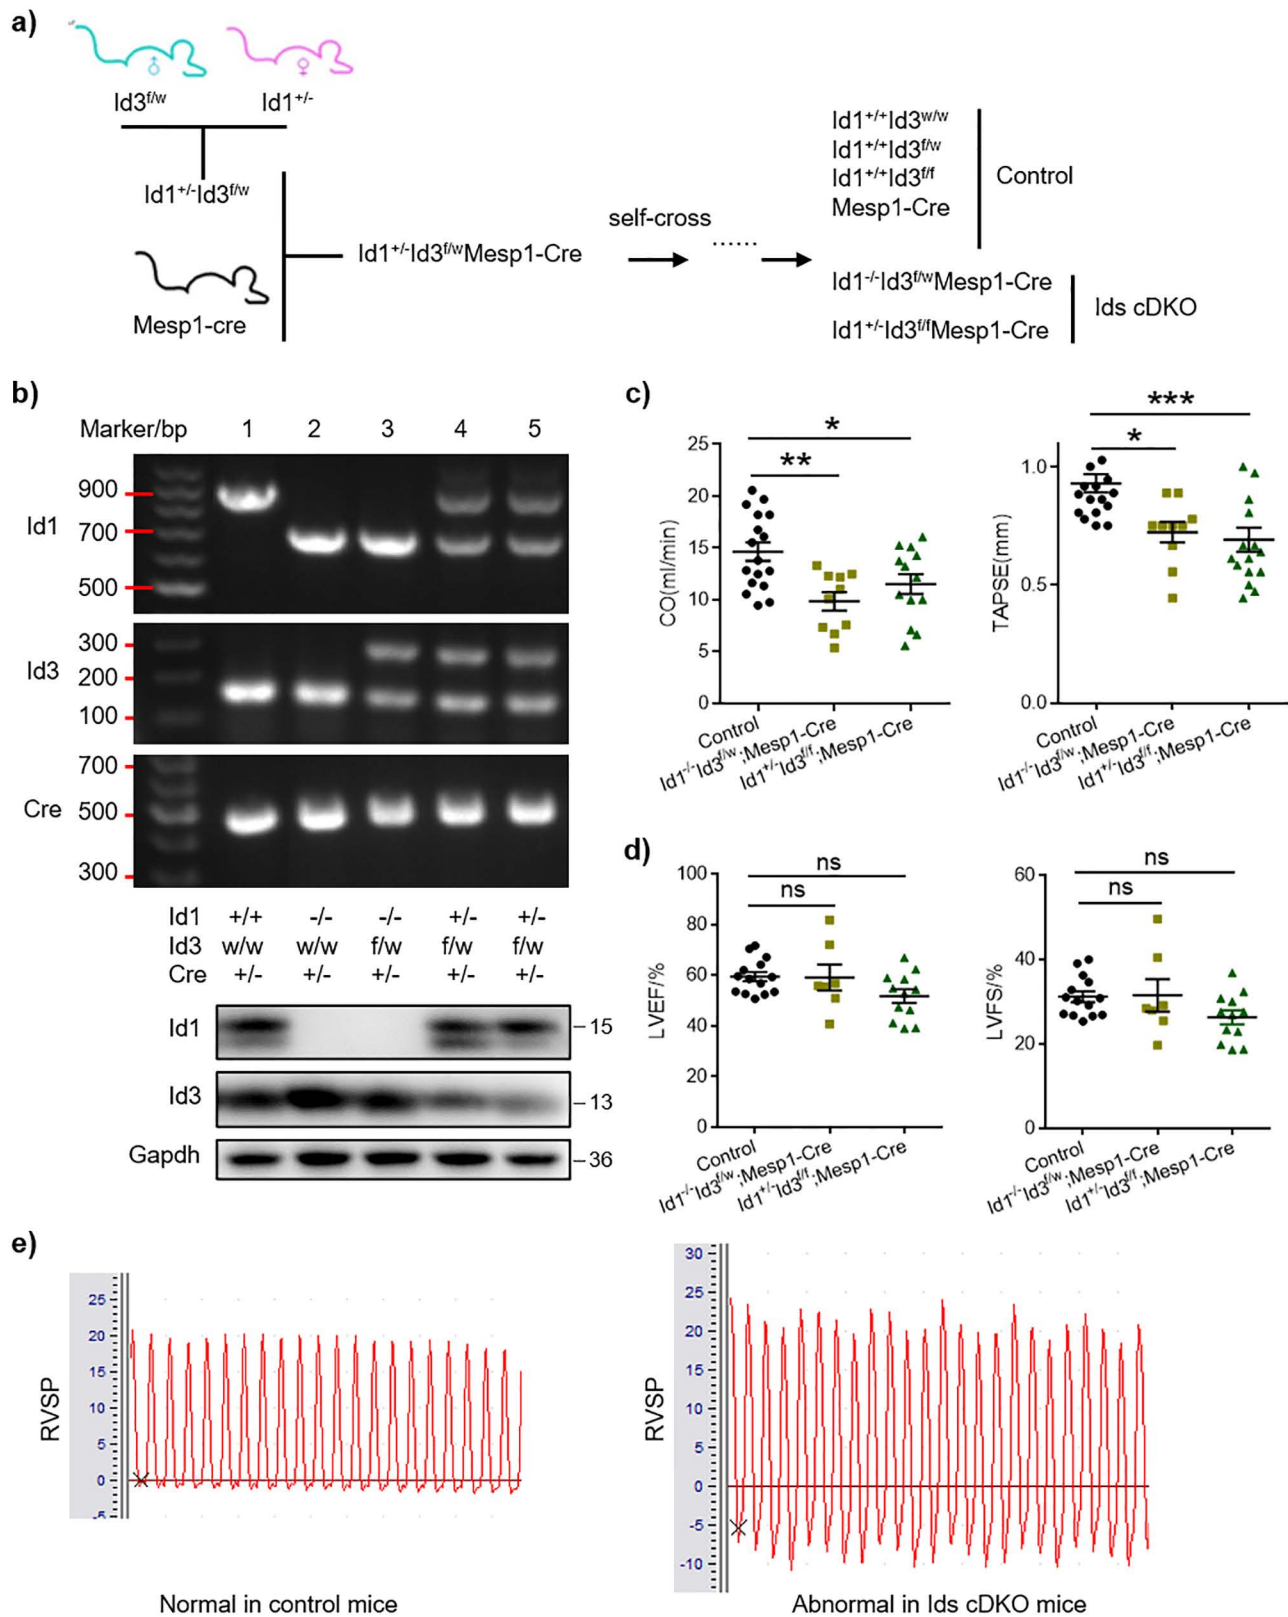

Figure S5

a)

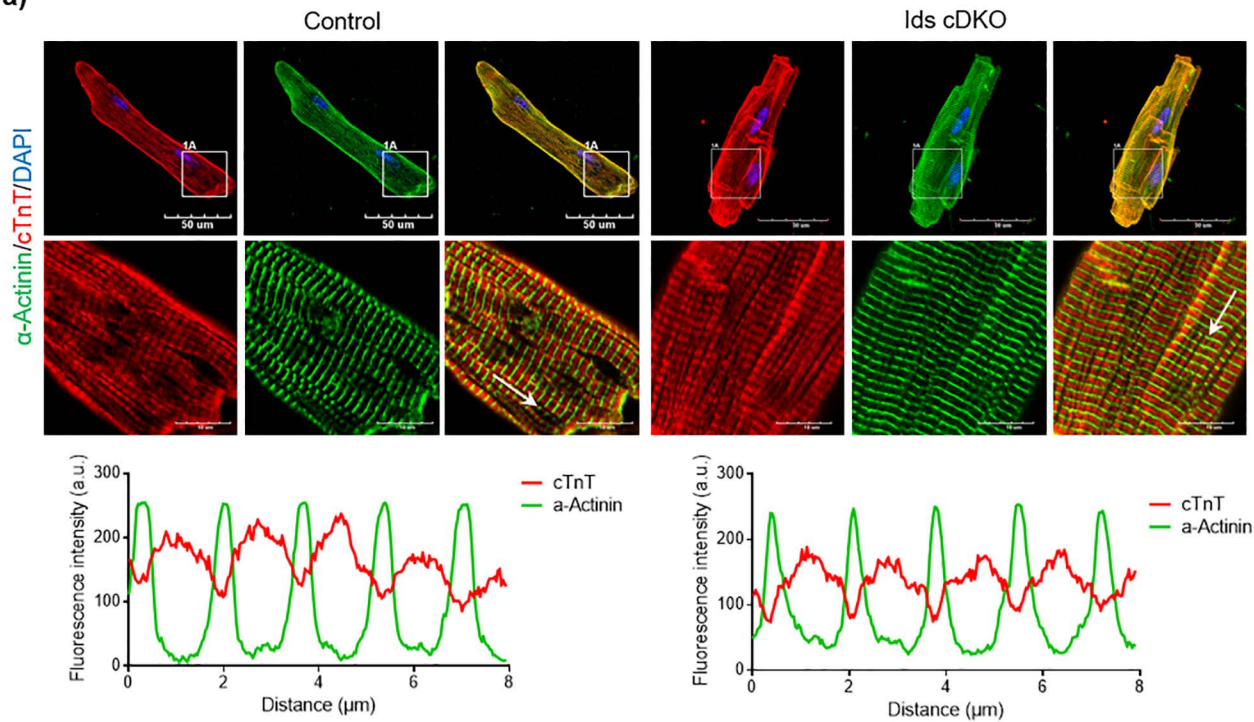

b)

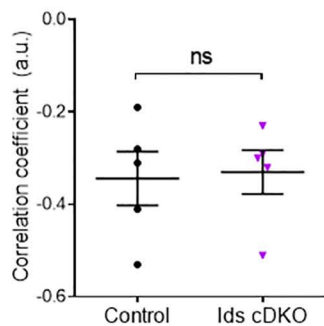

Figure S6

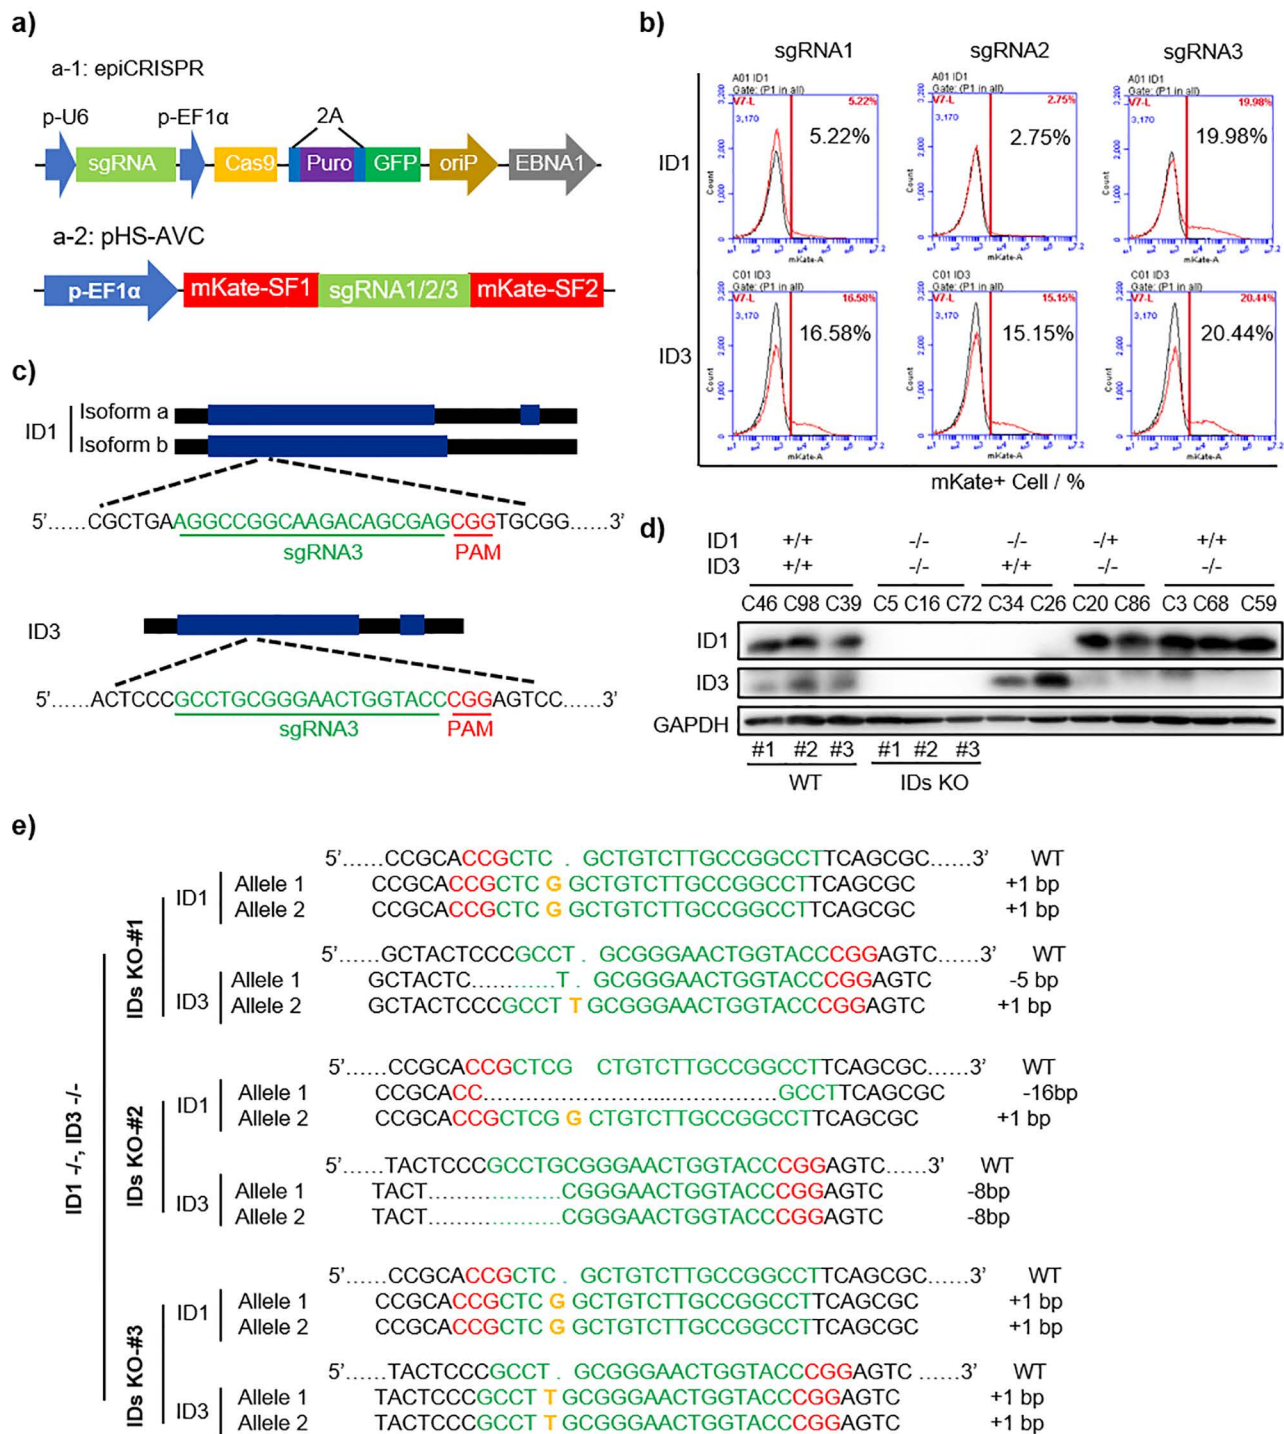

Supplement: ERJ-00327-2021.Figures.pdf [file ERJ-00327-2021.Figures.pdf]
